# Supplementary material
Source: PubMed Central journal article supplement (PMC5166538)
Supplement: jcav07p2280s1.pdf [file jcav07p2280s1.pdf]

**Supplementary Table1. Four kinds of primers of present 13 studies**

| <b>Author</b>                | <b>Year</b> | <b>Forward (bp)</b>         | <b>Reverse (bp)</b>         | <b>Island(bp)</b>       |
|------------------------------|-------------|-----------------------------|-----------------------------|-------------------------|
| Dong et al (2007, Korea)     | 2007        | chr16:82,660,749-82,660,767 | chr16:82,660,652-82,660,673 | chr16:82660651-82661813 |
| Feng et al (2008, USA)       | 2008        | chr16:82,660,749-82,660,767 | chr16:82,660,652-82,660,673 | chr16:82660651-82661813 |
| Hanabata et al (2004, Japan) | 2004        | chr16:82,660,749-82,660,767 | chr16:82,660,652-82,660,673 | chr16:82660651-82661813 |
| Hsu et al (2007, Taiwan)     | 2007        | chr16:82,660,749-82,660,767 | chr16:82,660,652-82,660,673 | chr16:82660651-82661813 |
| Jin et al (2009, Japan)      | 2009        | chr16:82,627,104-82,627,124 | chr16:82,627,187-82,627,206 | chr16:82660651-82661813 |
| Nikolaidis et al (2012, UK)  | 2012        | chr16:82,660,654-82,660,671 | chr16:82,660,705-82,660,726 | chr16:82660651-82661813 |
| Toyooka et al (2001, USA)    | 2001        | chr16:82,660,749-82,660,767 | chr16:82,660,652-82,660,673 | chr16:82660651-82661813 |
| Toyooka et al (2003, USA)    | 2003        | chr16:82,660,749-82,660,767 | chr16:82,660,652-82,660,673 | chr16:82660651-82661813 |
| Tsou et al (2007, USA)       | 2007        | chr16:82,660,709-82,660,729 | chr16:82,660,792-82,660,811 | chr16:82660651-82661813 |
| Ulivi et al (2006, Italy)    | 2006        | chr16:82,660,749-82,660,767 | chr16:82,660,652-82,660,673 | chr16:82660651-82661813 |
| Wang et al (2008, China)     | 2008        | NA                          | NA                          | chr16:82660651-82661813 |
| Zhai et al (2014, China)     | 2014        | chr16:82,660,749-82,660,767 | chr16:82,660,652-82,660,673 | chr16:82660651-82661813 |
| Zhang et al (2011, China)    | 2011        | chr16:82,660,749-82,660,767 | chr16:82,660,652-82,660,673 | chr16:82660651-82661813 |

NA: not found in the article.

**Supplementary Table 2. Differential CDH13 methylation, odds ratio between adenocarcinoma, squamous cell carcinoma and their counterparts from**

**GSE39279 & GSE52401 dataset**

| Type | Position       | CpG site   | McaM    | McoM    | $\Delta\beta$ | p-value <sup>a</sup> | p-value <sup>b</sup> |
|------|----------------|------------|---------|---------|---------------|----------------------|----------------------|
| LUAD | chr16:82660670 | cg08747377 | 0.32658 | 0.1609  | 0.16568       | 1.11E-51             | 4.43E-28             |
|      | chr16:82660727 | cg05374412 | 0.23438 | 0.04392 | 0.19046       | 9.02E-77             | 1.29E-22             |
|      | chr16:82661421 | cg08856946 | 0.2117  | 0.07414 | 0.13756       | 2.63E-68             | 1.21E-24             |
|      | chr16:82661521 | cg13759328 | 0.28992 | 0.17442 | 0.11549       | 9.78E-61             | 1.29E-28             |
|      | chr16:82661638 | cg09189772 | 0.28967 | 0.1819  | 0.10778       | 2.63E-49             | 9.12E-26             |
|      | chr16:82661725 | cg19369556 | 0.27121 | 0.22947 | 0.04173       | 6.98E-09             | 6.44E-09             |
| LUSC | chr16:82660670 | cg08747377 | 0.23598 | 0.1609  | 0.07507       | 8.92E-12             | 1.61E-10             |
|      | chr16:82660727 | cg05374412 | 0.12757 | 0.04392 | 0.08365       | 3.65E-33             | 6.34E-14             |
|      | chr16:82661421 | cg08856946 | 0.14118 | 0.07414 | 0.06704       | 3.55E-30             | 6.01E-17             |
|      | chr16:82661521 | cg13759328 | 0.24259 | 0.17442 | 0.06817       | 2.59E-26             | 1.71E-17             |
|      | chr16:82661638 | cg09189772 | 0.23064 | 0.1819  | 0.04875       | 9.62E-10             | 1.51E-10             |
|      | chr16:82661725 | cg19369556 | 0.22208 | 0.22947 | 0.00739       | 0.005638311          | 0.145187084          |

McaM and McoM represent the mean of case methylation (Beta) and mean of control methylation (Beta). Methylation levels are calculated with formula: Beta = (M/M + U).

Position represents the chromosome position of each CpG site according to GRCh37/hg19.

P-value<sup>a</sup> was calculated from Wilcoxon rank sum test after false discovery rate(FDR adjustment).

P-value<sup>b</sup> was calculated from logistic regression analysis after false discovery rate(FDR adjustment).

**Supplementary Table 3. Differential methylation, odds ratio between adenocarcinoma, squamous cell carcinoma and their counterparts from**

**GSE56044 dataset**

| <b>Type</b> | <b>CpG site</b> | <b>Position</b> | <b>McaM</b> | <b>McoM</b> | <b><math>\Delta\beta</math></b> | <b>p-value<sup>a</sup></b> | <b>p-value<sup>b</sup></b> |
|-------------|-----------------|-----------------|-------------|-------------|---------------------------------|----------------------------|----------------------------|
| <b>LUAD</b> | cg08747377      | chr16:82660670  | 0.31        | 0.07        | 0.24                            | 3.73E-5                    | 0.009                      |
|             | cg05374412      | chr16:82660727  | 0.26        | 0.02        | 0.24                            | 1.98E-5                    | 0.03                       |
|             | cg00806490      | chr16:82660873  | 0.25        | 0.07        | 0.18                            | 1.20E-5                    | 0.009                      |
|             | cg08856946      | chr16:82661421  | 0.18        | 0.05        | 0.13                            | 3.80E-5                    | 0.02                       |
|             | cg13759328      | chr16:82661521  | 0.22        | 0.10        | 0.12                            | 3.80E-5                    | 0.01                       |
|             | cg09189772      | chr16:82661638  | 0.24        | 0.12        | 0.12                            | 0.001                      | 0.01                       |
|             | cg19369556      | chr16:82661725  | 0.20        | 0.17        | 0.03                            | 0.85                       | 0.52                       |
| <b>LUSC</b> | cg08747377      | chr16:82660670  | 0.17        | 0.07        | 0.10                            | 0.02                       | 0.08                       |
|             | cg05374412      | chr16:82660727  | 0.10        | 0.02        | 0.08                            | 0.16                       | 0.21                       |
|             | cg00806490      | chr16:82660873  | 0.15        | 0.07        | 0.08                            | 0.003                      | 0.08                       |
|             | cg08856946      | chr16:82661421  | 0.11        | 0.05        | 0.06                            | 0.14                       | 0.17                       |
|             | cg13759328      | chr16:82661521  | 0.19        | 0.10        | 0.09                            | 0.008                      | 0.08                       |
|             | cg09189772      | chr16:82661638  | 0.18        | 0.12        | 0.06                            | 0.24                       | 0.27                       |
|             | cg19369556      | chr16:82661725  | 0.15        | 0.17        | 0.02                            | 0.15                       | 0.50                       |

McaM and McoM represent the mean of case methylation (Beta) and mean of control methylation (Beta). Methylation levels are calculated with formula:  $\text{Beta} = (M/M + U)$ .

Position represents the chromosome position of each CpG site according to GRCh37/hg19.

P-values<sup>a</sup> are calculated from Wilcoxon rank sum test after false discovery rate (FDR adjustment).

P-value<sup>b</sup> and OR<sup>b</sup> and 95%CI<sup>b</sup> are from logistic regression analysis with P-value<sup>b</sup> were also after false discovery rate (FDR adjustment).

**Supplementary Table 4. Diagnosis sensitivity, specificity, accuracy and AUC based on logistic regression with fivefold cross-validation**

|                      | <b>CpGsite</b> | <b>Sensitivity</b> | <b>Specificity</b> | <b>Accuracy</b> | <b>AUC</b>   |
|----------------------|----------------|--------------------|--------------------|-----------------|--------------|
| <b>LUAD vs.</b>      | cg08747377     | 0.884              | 0.774              | 0.82            | <b>0.866</b> |
|                      | cg05374412     | 0.924              | 0.886              | 0.898           | <b>0.936</b> |
| <b>Control</b>       | cg08856946     | 0.894              | 0.818              | 0.85            | <b>0.896</b> |
|                      | cg09189772     | 0.87               | 0.752              | 0.8             | <b>0.828</b> |
| <b>LUSC vs.</b>      | cg08747377     | 0.756              | 0.572              | 0.686           | <b>0.658</b> |
|                      | cg05374412     | 0.806              | 0.698              | 0.764           | <b>0.744</b> |
| <b>Control</b>       | cg08856946     | 0.758              | 0.7                | 0.734           | <b>0.722</b> |
|                      | cg09189772     | 0.762              | 0.524              | 0.672           | <b>0.596</b> |
| <b>LUAD vs. LUSC</b> | cg08747377     | 0.784              | 0.768              | 0.776           | <b>0.816</b> |
|                      | cg05374412     | 0.824              | 0.832              | 0.828           | <b>0.87</b>  |
|                      | cg08856946     | 0.802              | 0.756              | 0.78            | <b>0.83</b>  |
|                      | cg09189772     | 0.776              | 0.742              | 0.762           | <b>0.78</b>  |

Logistic regression was conducted to perform the diagnosis analysis. Sensitivity, specificity, accuracy and AUC were derived from the test result of the model

**Supplementary Table 5. The QUADAS results for the 13 publications in the meta-analysis**

| Study                        | QUADAS Question |   |   |   |   |   |   |   |   |    |    |    |    |    | Total Score |
|------------------------------|-----------------|---|---|---|---|---|---|---|---|----|----|----|----|----|-------------|
|                              | 1               | 2 | 3 | 4 | 5 | 6 | 7 | 8 | 9 | 10 | 11 | 12 | 13 | 14 |             |
| Dong et al (2007, Korea)     | 1               | 1 | 1 | 1 | 1 | 1 | 1 | 1 | 1 | 0  | 1  | 1  | 0  | 0  | 11          |
| Feng et al (2008, USA)       | 1               | 1 | 1 | 1 | 1 | 1 | 1 | 1 | 1 | 0  | 1  | 1  | 1  | 0  | 12          |
| Hanabata et al (2004, Japan) | 1               | 1 | 1 | 1 | 1 | 1 | 1 | 1 | 1 | 0  | 1  | 1  | 0  | 0  | 11          |
| Hsu et al (2007, Taiwan)     | 1               | 1 | 1 | 1 | 1 | 1 | 1 | 1 | 1 | 0  | 1  | 1  | 1  | 0  | 12          |
| Jin et al (2009, Japan)      | 1               | 1 | 1 | 1 | 1 | 1 | 1 | 1 | 1 | 0  | 1  | 1  | 1  | 0  | 12          |
| Nikolaidis et al (2012, UK)  | 1               | 1 | 1 | 1 | 1 | 1 | 1 | 1 | 1 | 0  | 1  | 1  | 0  | 0  | 11          |
| Toyooka et al (2001, USA)    | 1               | 1 | 1 | 1 | 1 | 1 | 1 | 1 | 1 | 0  | 1  | 1  | 0  | 0  | 11          |
| Toyooka et al (2003, USA)    | 1               | 1 | 1 | 1 | 1 | 1 | 1 | 1 | 1 | 0  | 1  | 1  | 0  | 0  | 11          |
| Tsou et al (2007, USA)       | 1               | 1 | 1 | 1 | 1 | 1 | 1 | 1 | 1 | 0  | 1  | 1  | 1  | 0  | 12          |
| Ulivi et al (2006, Italy)    | 1               | 1 | 1 | 1 | 0 | 1 | 1 | 1 | 1 | 0  | 1  | 1  | 0  | 0  | 10          |
| Wang et al (2008, China)     | 1               | 1 | 1 | 1 | 1 | 1 | 1 | 1 | 1 | 0  | 1  | 1  | 1  | 0  | 12          |
| Zhai et al (2014, China)     | 1               | 1 | 1 | 1 | 0 | 1 | 1 | 1 | 1 | 0  | 1  | 1  | 0  | 0  | 10          |
| Zhang et al (2011, China)    | 1               | 1 | 1 | 1 | 1 | 1 | 1 | 1 | 1 | 0  | 1  | 1  | 0  | 0  | 11          |

Supplementary Figure 1. Funnel plot to diagnosis of the publication bias

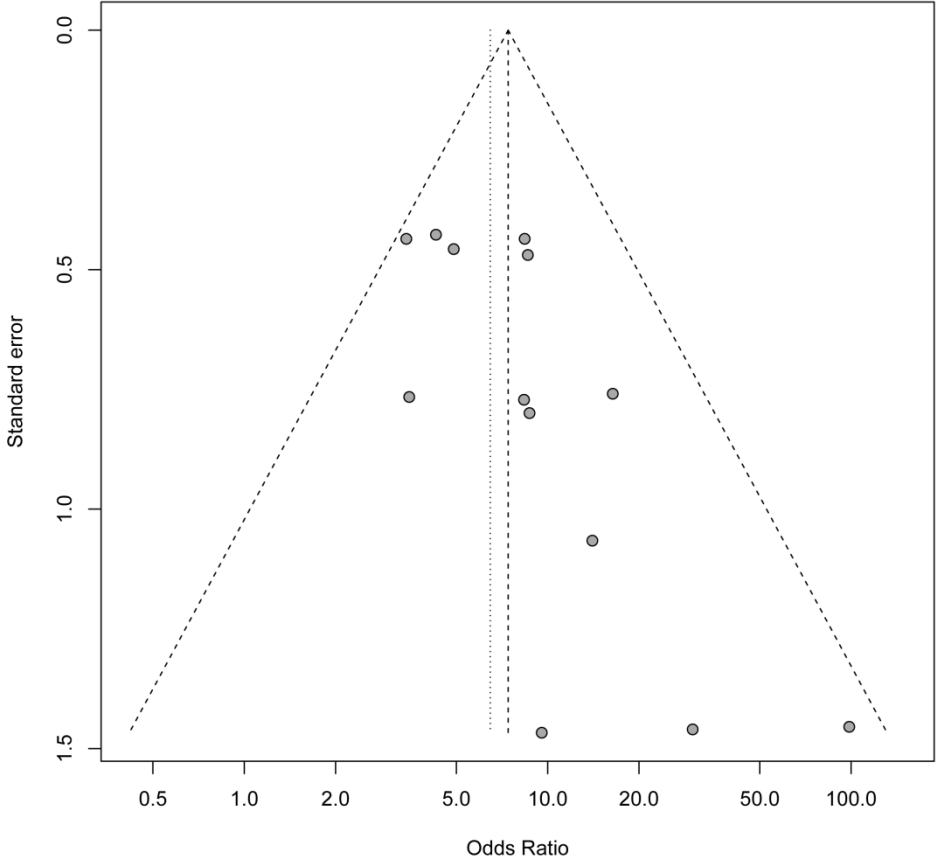

**Supplementary Figure 2. Combined estimates for the association between CDH13 methylation and NSCLC after trim-fill treatment.**

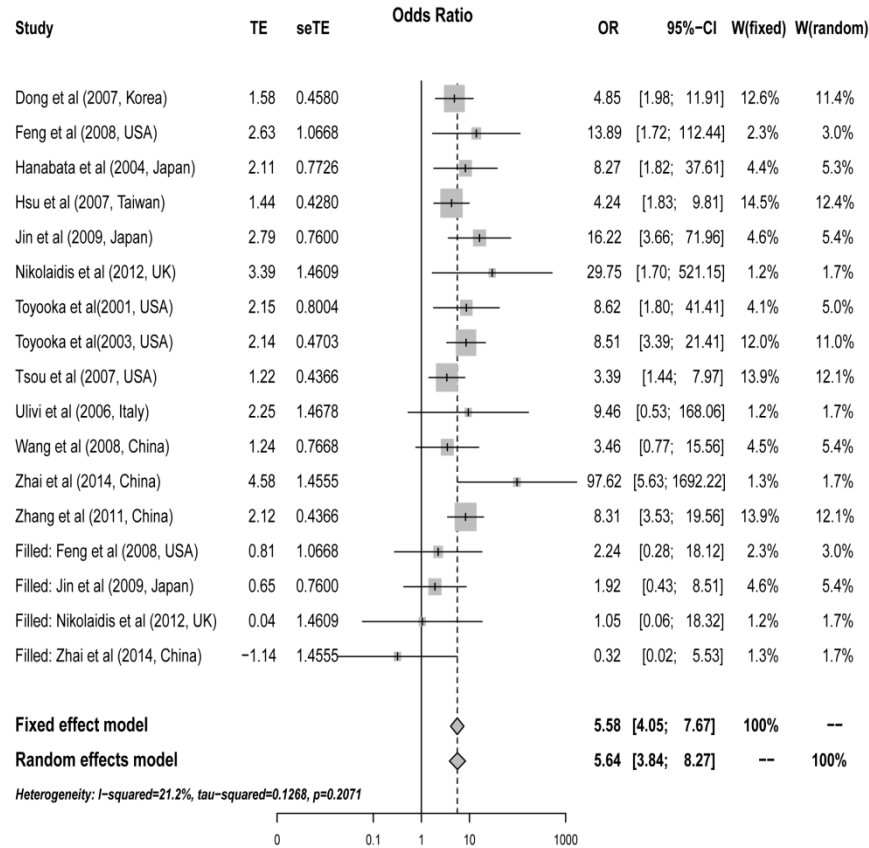

**Supplementary Figure 3. Sensitivity analyses of the overall effect by omitting a single study.**

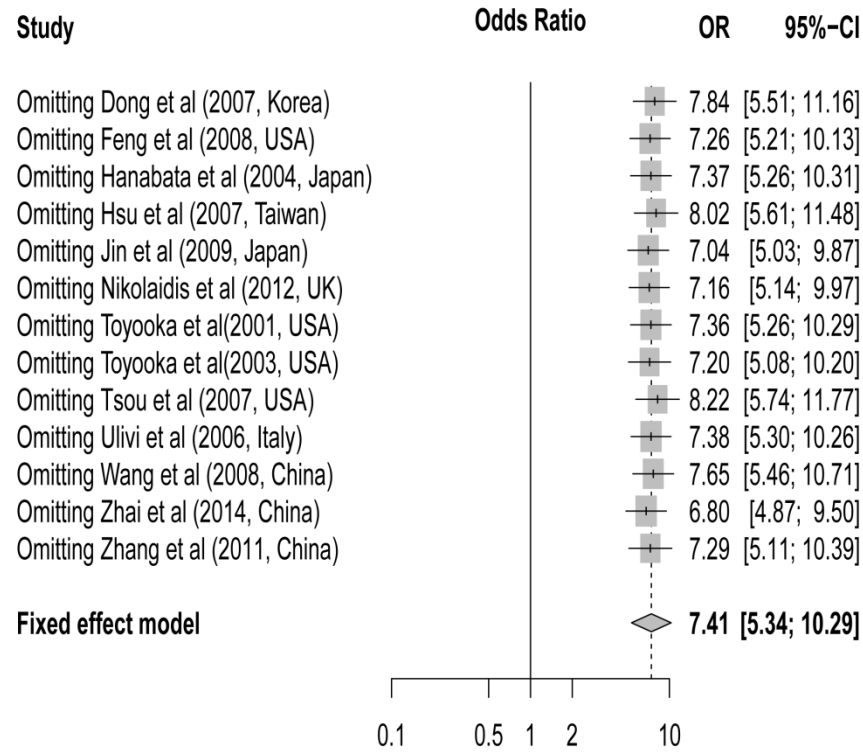





Supplementary Figure 5. CpG sites on the Illumina Infinium HumanMethylation450 Beadchip array across CDH13 gene region from GSE56044 dataset.

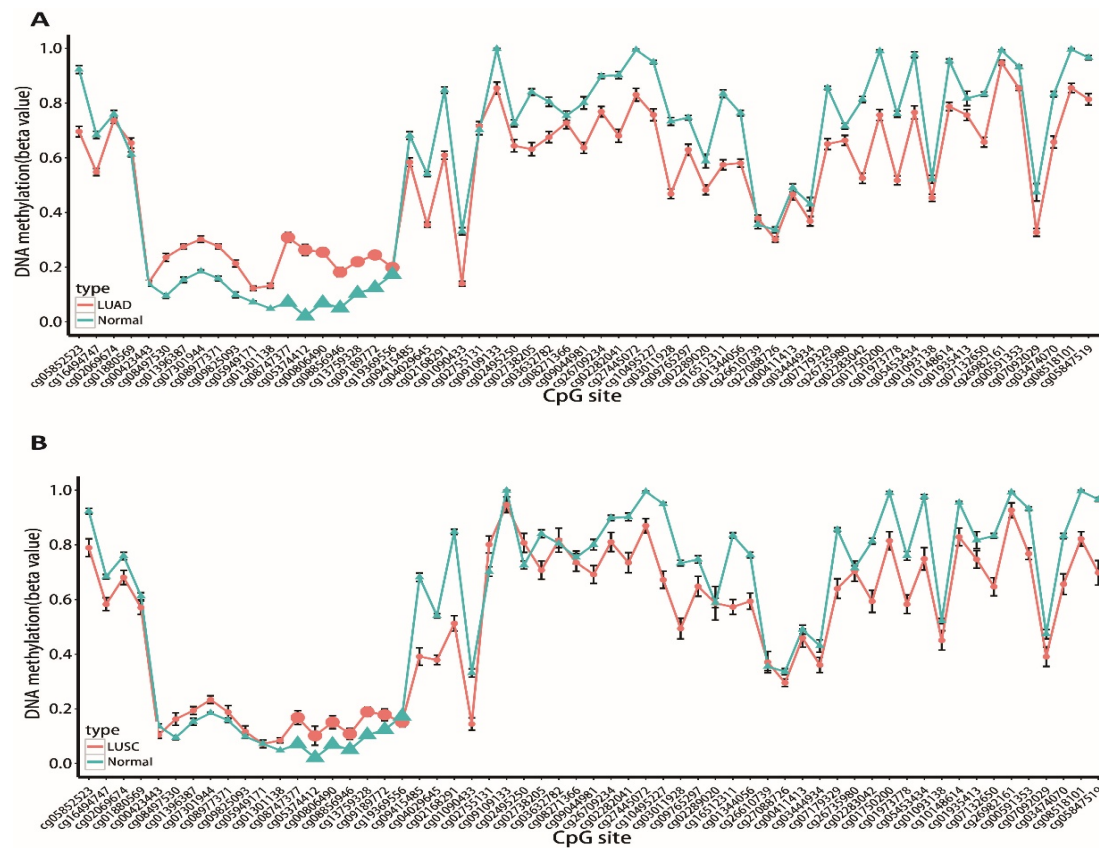

The x-axis showed the different CpG sites in CDH13 gene and the y-axis shows the beta value of each CpG site to represent the methylation level of each CpG site.
